# Supplementary material for: MnAPO-5 as an efficient heterogeneous catalyst for selective liquid phase partial oxidation reactions
Source: Royal Society of Chemistry journal article supplement (doi:10.1039/c7dt03897f), 2017-12-05
Supplement: c7dt03897f1.pdf [file c7dt03897f1.pdf]

## Electronic Supplementary Information

### MnAPO-5 as an efficient heterogeneous catalyst for selective liquid phase partial oxidation reactions

Sauvik Chatterjee,<sup>a</sup> Piyali Bhanja,<sup>a</sup> Luna Paul,<sup>b</sup> Mohammad Ali,<sup>b</sup> and Asim Bhaumik\*,<sup>a</sup>

<sup>a</sup> Department of Materials Science, Indian Association for the Cultivation of Science, 2A & B Raja S. C. Mullick Road, Jadavpur, Kolkata 700 032, India,

Address for correspondence. E-mail: msab@iacs.res.in

<sup>b</sup> Department of Chemistry, Jadavpur University, Jadavpur, Kolkata 700 032, India

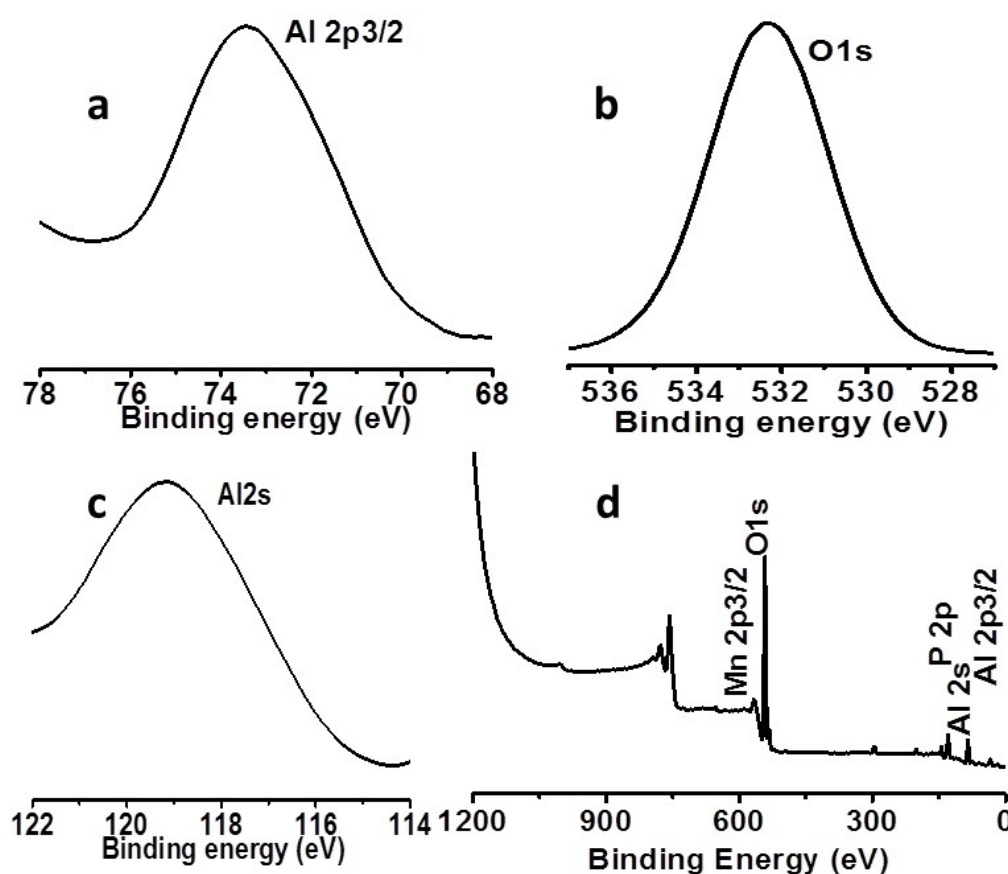

**Figure S1:** Short range XPS spectra for a) Al 2p<sub>3/2</sub>, b) O 1s, c) Al 2s and d) Full range XPS survey spectra of MnAPO-5.

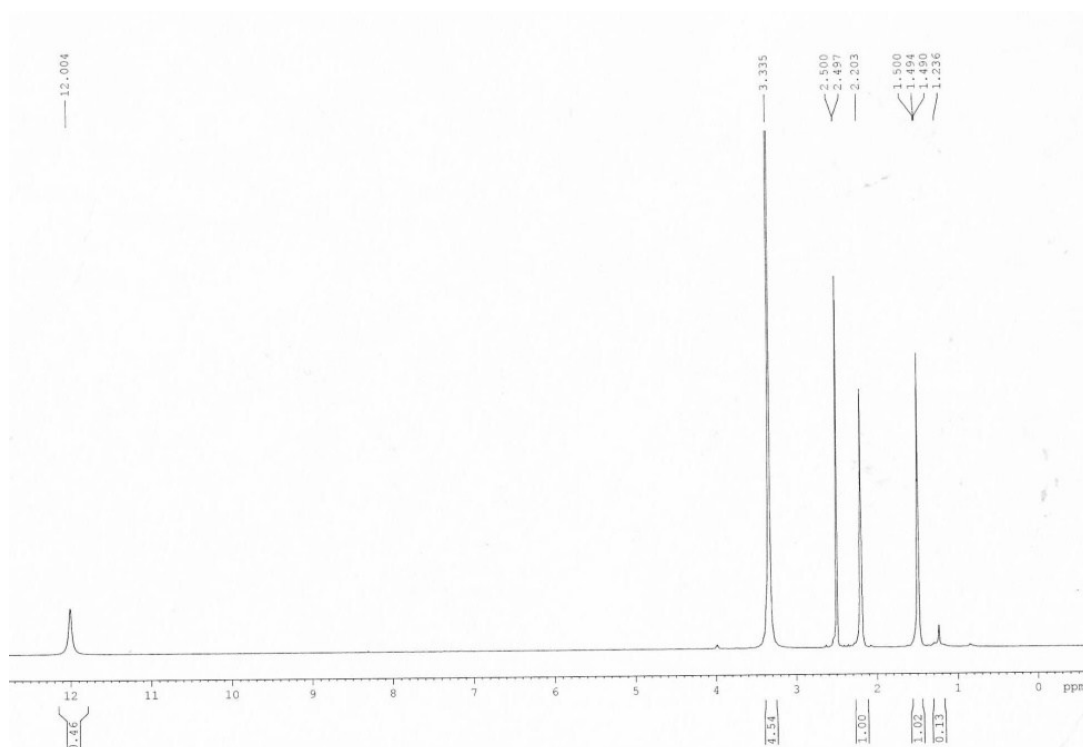

**Figure S2:**  $^1\text{H}$  NMR of adipic acid obtained from the liquid phase catalytic oxidation cyclohexanone over MnAPO-5.

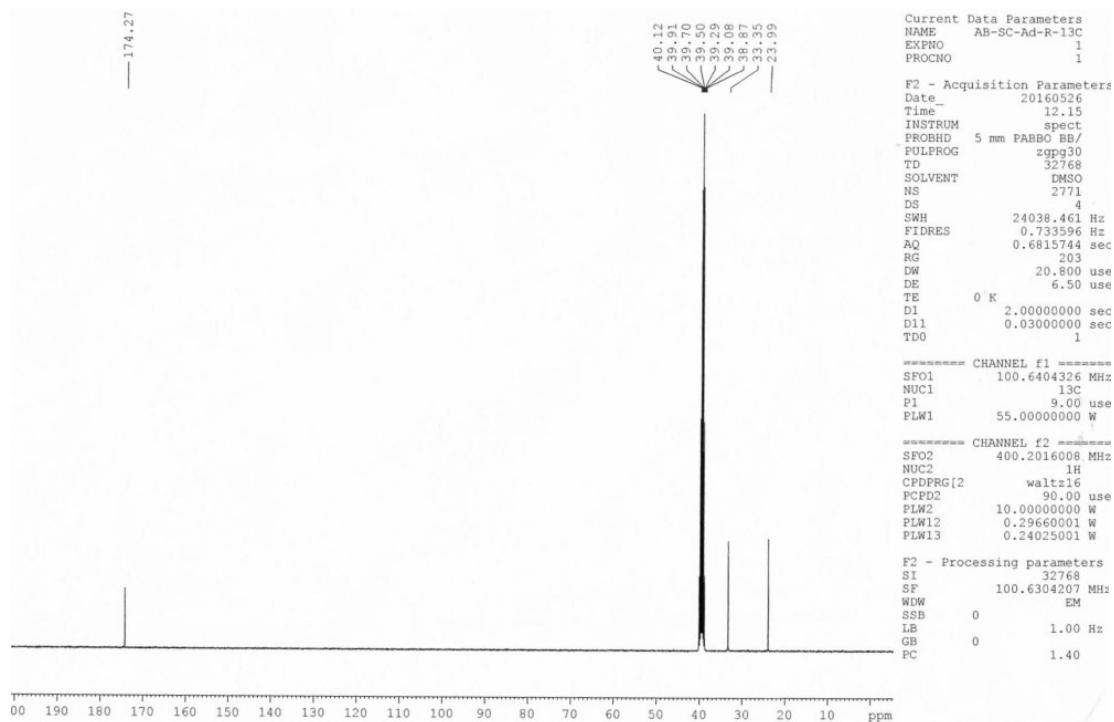

**Figure S3:**  $^{13}\text{C}$  MNR of adipic acid obtained from the liquid phase catalytic oxidation cyclohexanone over MnAPO-5.

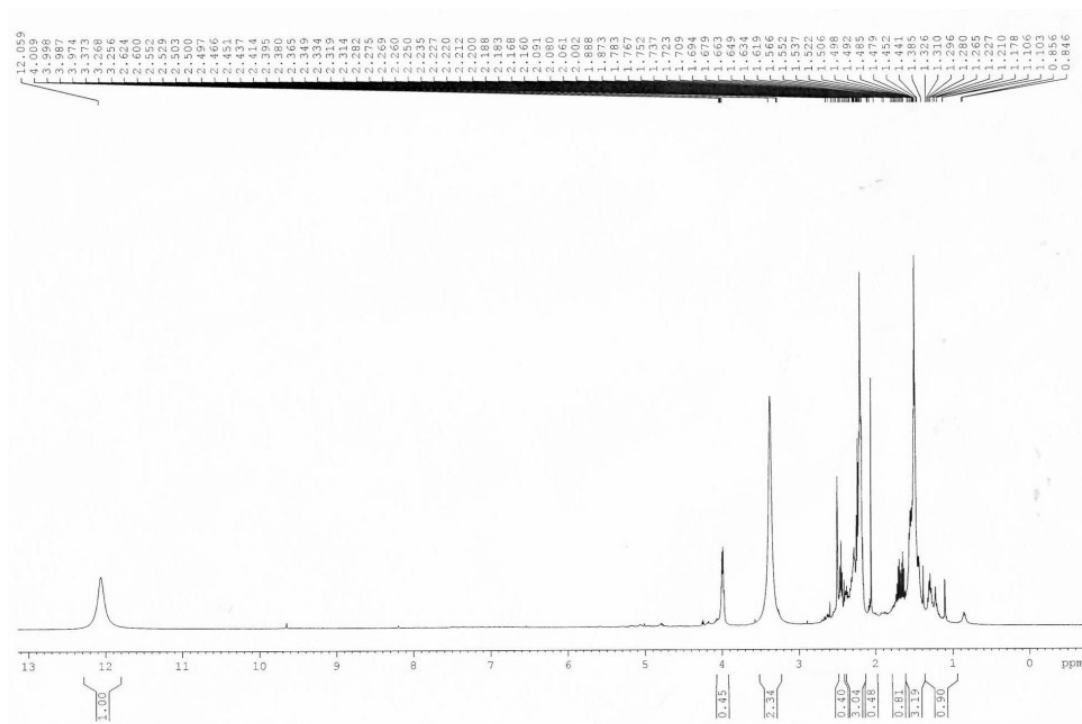

**Figure S4:**  $^1\text{H}$  NMR of the crude reaction mixture after liquid phase catalytic oxidation of cyclohexanone over MnAPO-5.

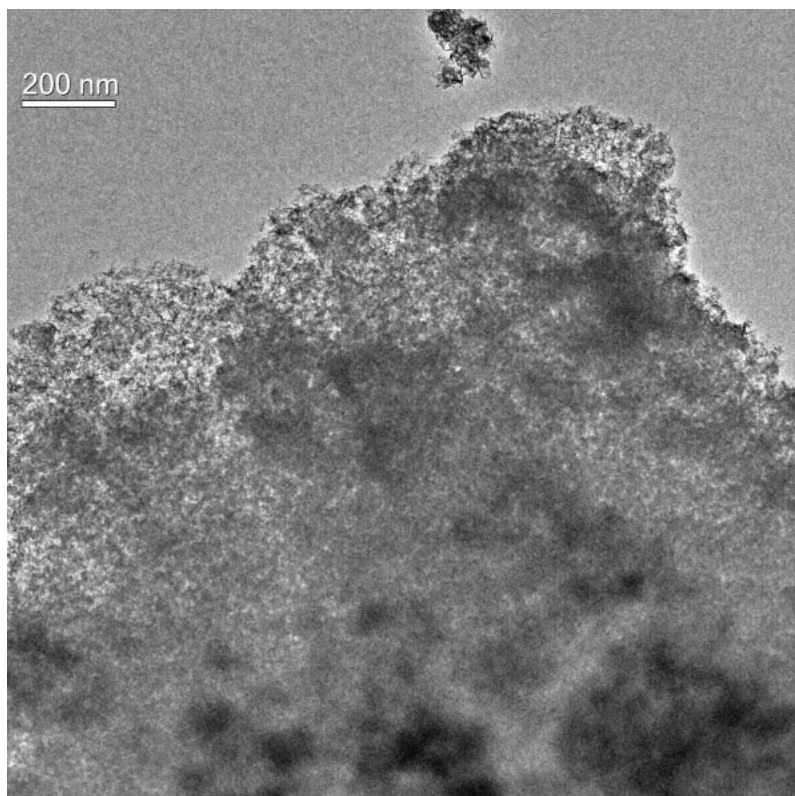

**Figure S5:** UHR-TEM image of the recovered MnAPO-5 material after six consecutive reaction cycles in the selective catalytic oxidation of cyclohexanone.
